# Supplementary material for: Associative learning changes cross-modal representations in the gustatory cortex
Source: eLife. 2016 Aug 30;5:e16420. doi: 10.7554/eLife.16420 (PMC5026467; doi:10.7554/eLife.16420)
Supplement: Figure 1—source data 1. — DOI: http://dx.doi.org/10.7554/eLife.16420.004 [file elife-16420-fig1-data1.xlsx]

## Sheet: Figure1A
Stimulus	Fraction Neurons	Percentage Neurons (%)
Sucrose	52/135	38.51
NaCl	56/135	41.48
Citric Acid	56/135	41.48
Quinine-Hcl	52/135	38.51
Air puff	21/135	15.5
Odor	22/135	16.29
Tone	6/135	4.4
Light	5/135	3.7

## Sheet: Figure1B
Stimulus	Fraction Neurons	Percentage Neurons (%)
Taste Only	61/87	70.11
Taste &1	22/87	25.28
Taste &2	4/87	4.6

## Sheet: Figure1C
Stimulus	Fraction Neurons	Percentage Neurons (%)
1 Stimulus	38/45	84.44
2 Stimulus	5/45	11.11
3 Stimulus	2/45	4.44
