# Supplementary material for: Associative learning changes cross-modal representations in the gustatory cortex
Source: eLife. 2016 Aug 30;5:e16420. doi: 10.7554/eLife.16420 (PMC5026467; doi:10.7554/eLife.16420)
Supplement: Figure 2—source data 1. — DOI: http://dx.doi.org/10.7554/eLife.16420.007 [file elife-16420-fig2-data1.xlsx]

## Sheet: Figure2A
"Air puff"	"Odor"	"Tone"	"Light"		"Days"	"TemporalEpochs"	"RatsID"
0.285062	0.139739	0.170445	0.112853		First	Spont	#1
0.222497	0.171096	0.201458	0.0388849		First	Spont	#2
0.110896	0.0580465	0.0413459	0.13022		First	Spont	#3
0.294746	0.180858	0.0430341	0.127415		First	Spont	#4
0.0463361	0.0185658	0.0976203	0.0293797		First	Spont	#5
0.258544	0.131672	0.16505	0.0476037		First	Cue	#1
0.259838	0.0963342	0.165021	0.0440295		First	Cue	#2
0.127149	0.0430861	0.0603804	0.0884625		First	Cue	#3
0.187112	0.240543	0.0377241	0.16771		First	Cue	#4
0.1543	0.0611671	0.0548137	0.0219579		First	Cue	#5
0.539828	0.643933	0.396911	0.535165		First	Taste	#1
0.638485	0.800981	0.592149	0.664782		First	Taste	#2
0.598376	0.701654	0.621544	0.6275		First	Taste	#3
0.511154	0.426215	0.633471	0.590144		First	Taste	#4
0.411938	0.561078	0.551725	0.50418		First	Taste	#5
0.0652312	0.0639013	0.0681632	0.0593645		Last	Spont	#1
0.122319	0.0428837	0.0855069	0.0969769		Last	Spont	#2
0.0784399	0.0820233	0.167363	0.156242		Last	Spont	#3
0.0980503	0.0422256	0.0536481	0.110648		Last	Spont	#4
0.155938	0.135857	0.128922	0.122061		Last	Spont	#5
0.620899	0.562278	0.330263	0.544185		Last	Cue	#1
0.51234	0.418262	0.438896	0.431017		Last	Cue	#2
0.567798	0.598359	0.394643	0.40708		Last	Cue	#3
0.450845	0.508507	0.402893	0.513082		Last	Cue	#4
0.456863	0.679471	0.637498	0.401019		Last	Cue	#5
0.536433	0.719274	0.563453	0.546426		Last	Taste	#1
0.578763	0.608086	0.544518	0.470643		Last	Taste	#2
0.612608	0.716165	0.676719	0.698429		Last	Taste	#3
0.558191	0.688583	0.669252	0.689938		Last	Taste	#4
0.623045	0.490943	0.6596	0.688023		Last	Taste	#5

## Sheet: Figure2B
Days	Stimulus	Mean	Standard Error
1	Air Puff	-0.0201392	0.0286641
2	Air Puff	0.202903	0.0298664
3	Air Puff	0.358479	0.0689549
4	Air Puff	0.319865	0.045781
5	Air Puff	0.362573	0.0644727
6	Air Puff	0.376675	0.0443431
7	Air Puff	0.37851	0.0233423
8	Air Puff	0.392988	0.0407014
9	Air Puff	0.448543	0.0330963
10	Air Puff	0.371754	0.0671629
11	Air Puff	0.450407	0.0519099
12	Air Puff	0.43564	0.049467
13	Air Puff	0.42169	0.0278097
14	Air Puff	0.44696	0.0414118
1	Odor	0.00254365	0.0341649
2	Odor	0.163883	0.033116
3	Odor	0.280702	0.0671897
4	Odor	0.237969	0.0363807
5	Odor	0.350584	0.0604515
6	Odor	0.325415	0.0421606
7	Odor	0.295499	0.061697
8	Odor	0.359225	0.0231974
9	Odor	0.385563	0.0394951
10	Odor	0.361068	0.0352435
11	Odor	0.382041	0.0228672
12	Odor	0.427495	0.0211858
13	Odor	0.346639	0.0681002
14	Odor	0.422754	0.0458716
1	Tone	0.0151137	0.019698
2	Tone	0.0561379	0.0217377
3	Tone	0.192052	0.0511964
4	Tone	0.179803	0.0238224
5	Tone	0.0863028	0.0648509
6	Tone	0.18863	0.0207948
7	Tone	0.285194	0.0357806
8	Tone	0.266438	0.00879352
9	Tone	0.232536	0.0361538
10	Tone	0.3188	0.0432663
11	Tone	0.292565	0.0495526
12	Tone	0.341884	0.0458064
13	Tone	0.288691	0.022863
14	Tone	0.406346	0.0554052
1	Light	-0.023583	0.016844
2	Light	0.0879263	0.0401683
3	Light	0.0528691	0.0582195
4	Light	0.102676	0.0250526
5	Light	0.139582	0.0470266
6	Light	0.108571	0.0244211
7	Light	0.26238	0.0254763
8	Light	0.272804	0.0265475
9	Light	0.264878	0.0187831
10	Light	0.285362	0.0399183
11	Light	0.275629	0.0741544
12	Light	0.222248	0.0560913
13	Light	0.317761	0.0189216
14	Light	0.39248	0.058404
