# Supplementary material for: Associative learning changes cross-modal representations in the gustatory cortex
Source: eLife. 2016 Aug 30;5:e16420. doi: 10.7554/eLife.16420 (PMC5026467; doi:10.7554/eLife.16420)
Supplement: Figure 3—source data 1. — DOI: http://dx.doi.org/10.7554/eLife.16420.010 [file elife-16420-fig3-data1.xlsx]

## Sheet: Figure3A
Stimulus	Fraction Neurons	Percentage Neurons (%)
Sucrose	42/118	35.59
NaCl	43/118	36.44
Citric Acid	50/118	42.37
Quinine-Hcl	49/118	41.52
Air puff	41/118	34.74
Odor	39/118	33.05
Tone	19/118	16.1
Light	14/118	11.8

## Sheet: Figure3B
Stimulus	Fraction Neurons	Percentage Neurons (%)
Taste Only	27/68	39.7
Taste &1	24/68	35.29
Taste &2	11/68	16.17
Taste &3	5/68	7.35
Taste &4	1/68	1.47

## Sheet: Figure3C
Stimulus	Fraction Neurons	Percentage Neurons (%)
1 Stimulus	35/69	50.72
2 Stimuli	25/69	36.23
3 Stimuli	8/69	11.59
4 Stimuli	1/69	1.44
