# Supplementary material for: Associative learning changes cross-modal representations in the gustatory cortex
Source: eLife. 2016 Aug 30;5:e16420. doi: 10.7554/eLife.16420 (PMC5026467; doi:10.7554/eLife.16420)
Supplement: Figure 5—source data 1. — DOI: http://dx.doi.org/10.7554/eLife.16420.015 [file elife-16420-fig5-data1.xlsx]

## Sheet: Figure5A
Condition	Excited-fraction of neurons	Excited-percentage of neurons		Inhibited-fraction of neurons	Inhibited-percentage of neurons
Untrained	38/54	70.37		16/54	29.62
Trained	59/113	52.21		54/113	47.78

## Sheet: Figure5C
	Mean	SEM
Untrained	1.22	0.06
Trained	1.44	0.07
