# Supplementary material for: Associative learning changes cross-modal representations in the gustatory cortex
Source: eLife. 2016 Aug 30;5:e16420. doi: 10.7554/eLife.16420 (PMC5026467; doi:10.7554/eLife.16420)
Supplement: Figure 6—source data 1. — DOI: http://dx.doi.org/10.7554/eLife.16420.017 [file elife-16420-fig6-data1.xlsx]

## Sheet: Figure6C
	Mean	SEM
Correct hits	0.67	0.16
False hits	0.26	0.16

## Sheet: Figure6D
	Mean	SEM
Correct hits	0.48	0.03
False hits	0.25	0.04

## Sheet: Figure6E
	Mean	SEM
Correct hits	0.7	0.17
False hits	0.18	0.02

## Sheet: Figure6F
	Mean	SEM
Correct hits	0.45	0.09
False hits	0.38	0.04
