# Supplementary material for: Associative learning changes cross-modal representations in the gustatory cortex
Source: eLife journal article supplement (doi:10.7554/elife.16420), 2016-08-18

**A**

### Electrode locations

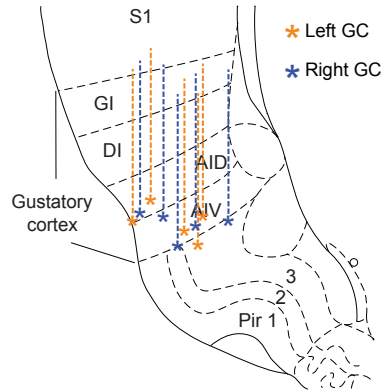**B**

### Experimental design

Random presentation of each stimulus (10-15 trials each):

#### Taste stimuli

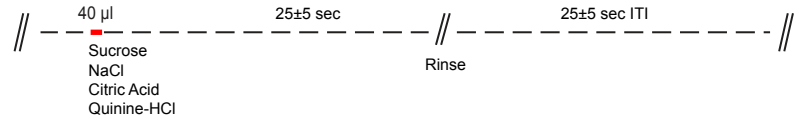

#### Cross-modal stimuli

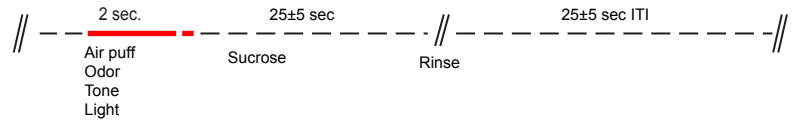

Supplement: supp [file elife_poa_e16420_Figure_3_figure_supplement_1.pdf › elife_poa_e16420_Figure_3_figure_supplement_1.pdf]
