# Supplementary material for: Associative learning changes cross-modal representations in the gustatory cortex
Source: eLife journal article supplement (doi:10.7554/elife.16420), 2016-08-18

# A

Fraction of cue-responsive neurons

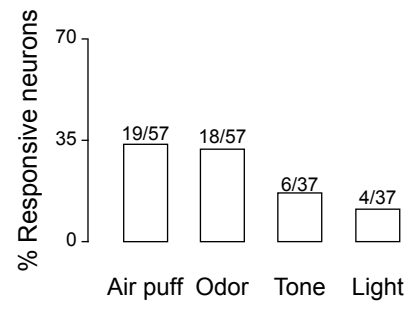

# B

Distribution of responsive neurons across recording days

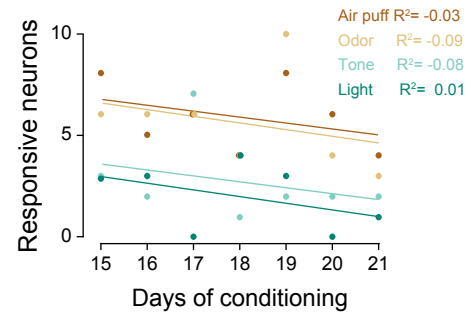

Supplement: supp [file elife_poa_e16420_Figure_3_figure_supplement_2.pdf › elife_poa_e16420_Figure_3_figure_supplement_2.pdf]
