# Supplementary figures and images for: Associative learning changes cross-modal representations in the gustatory cortex
Source: eLife journal article supplement (doi:10.7554/elife.16420), 2016-08-18

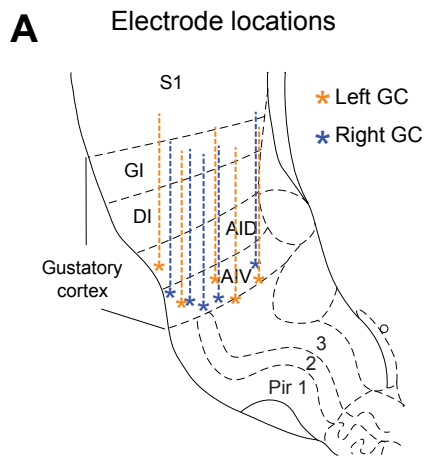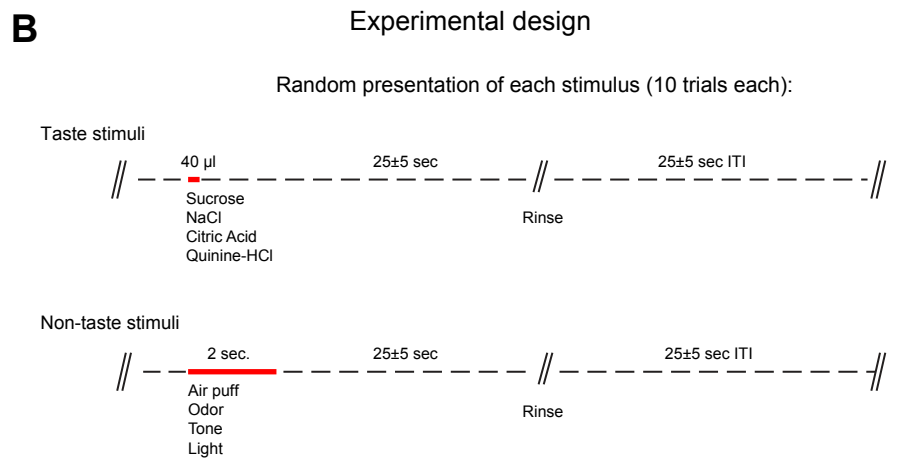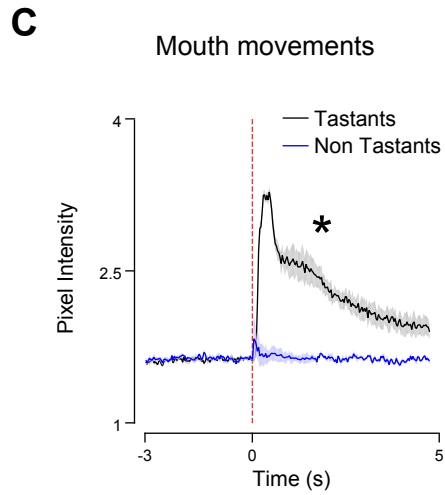

Supplement: supp [file elife_poa_e16420_Figure_1_figure_supplement_1.pdf › elife_poa_e16420_Figure_1_figure_supplement_1.pdf]

**A**

### Experimental design

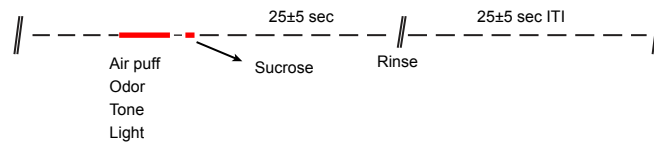**B**

### Temporal epochs

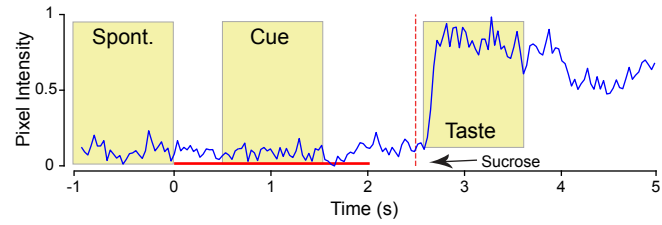

Supplement: supp [file elife_poa_e16420_Figure_2_figure_supplement_1.pdf › elife_poa_e16420_Figure_2_figure_supplement_1.pdf]
